# Supplementary material for: Modulation of Instagram Number of Followings by Avoidance in Close Relationships in Young Adults under a Gene x Environment Perspective
Source: MDPI journal article supplement (doi:10.3390/ijerph18147547), 2021-07-15
Supplement: s1 [file s1]

## Supplementary Formulas

*Formula S1: Definition of the considered Bayesian Information Criterion*

$$BIC = -2 * \ln(L) + k * \ln(n) \quad (1)$$

*Formula S2: Derivation of the Bayesian Factor from the Bayesian Information Criterion. Note: this formula represents a basic approximation which was sufficient for the theoretical hypothesis of this research*

$$BF = e^{[BIC(HA) - BIC(H0)]/2} \quad (2)$$

*Formula S3: Posterior probability of the null model*

$$pBIC(H0) = \frac{BF}{(BF + 1)} \quad (3)$$

*Formula S4: Posterior probability of the alternative model*

$$pBIC(HA) = 1 - pBIC(H0) \quad (4)$$

## Supplementary Tables

Table S1: ANCOVA on Instagram number of posts

Table 1: Results and effect sizes of hypothesis-driven ANCOVA computed for Instagram number of posts. Degrees of freedom (DF), sum square, mean square,  $F$  value,  $p$ -value and partial eta squared ( $p\eta^2$ ) are reported for main and interaction predictors.

| Variable                     | DF | Sum Square | Mean Square | $F$ value | $p$ -value | $p\eta^2$ |
|------------------------------|----|------------|-------------|-----------|------------|-----------|
| 5-HTTLPR/rs25531             | 1  | 0.014      | 0.014       | 0.261     | 0.612      | 0.005     |
| Anxiety                      | 1  | 0.006      | 0.006       | 0.111     | 0.741      | 0.002     |
| Avoidance                    | 1  | 0.154      | 0.154       | 2.822     | 0.099      | 0.052     |
| 5-HTTLPR/rs25531 x Anxiety   | 1  | 0.028      | 0.028       | 0.508     | 0.479      | 0.010     |
| 5-HTTLPR/rs25531 x Avoidance | 1  | 0.044      | 0.044       | 0.803     | 0.374      | 0.016     |
| Residuals                    | 51 | 2.787      | 0.055       |           |            |           |

Table S2: ANCOVA on Instagram SDI

Table 2: Results and effect sizes of hypothesis-driven ANCOVA computed for Instagram SDI. Degrees of freedom (DF), sum square, mean square,  $F$  value,  $p$ -value and partial eta squared ( $p\eta^2$ ) are reported for main and interaction predictors.

| Variable                     | DF | Sum Square | Mean Square | $F$ value | $p$ -value | $p\eta^2$ |
|------------------------------|----|------------|-------------|-----------|------------|-----------|
| 5-HTTLPR/rs25531             | 1  | 0.107      | 0.107       | 1.213     | 0.276      | 0.023     |
| Anxiety                      | 1  | 0.126      | 0.126       | 1.428     | 0.238      | 0.027     |
| Avoidance                    | 1  | 0.027      | 0.027       | 0.308     | 0.581      | 0.006     |
| 5-HTTLPR/rs25531 x Anxiety   | 1  | 0.012      | 0.012       | 0.134     | 0.716      | 0.003     |
| 5-HTTLPR/rs25531 x Avoidance | 1  | 0.001      | 0.001       | 0.007     | 0.934      | 0.000     |
| Residuals                    | 51 | 4.513      | 0.089       |           |            |           |

Table S3: ANCOVA on Instagram number of followers

Table 3: Results and effect sizes of exploratory ANCOVA computed for Instagram number of followers. Degrees of freedom (DF), sum square, mean square,  $F$  value,  $p$ -value and partial eta squared ( $p\eta^2$ ) are reported for main and interaction predictors.

| Variable                     | DF | Sum Square | Mean Square | $F$ value | $p$ -value | $p\eta^2$ |
|------------------------------|----|------------|-------------|-----------|------------|-----------|
| 5-HTTLPR/rs25531             | 1  | 0.157      | 0.157       | 0.618     | 0.436      | 0.012     |
| Anxiety                      | 1  | 0.470      | 0.470       | 1.852     | 0.180      | 0.035     |
| Avoidance                    | 1  | 0.660      | 0.660       | 2.600     | 0.113      | 0.049     |
| 5-HTTLPR/rs25531 x Anxiety   | 1  | 0.028      | 0.028       | 0.109     | 0.743      | 0.002     |
| 5-HTTLPR/rs25531 x Avoidance | 1  | 0.041      | 0.041       | 0.161     | 0.690      | 0.003     |
| Residuals                    | 51 | 12.937     | 0.254       |           |            |           |
